# Supplementary material
Source: publisher figshare collection journal article supplement (https://frontiersin.figshare.com/ndownloader/files/33359297)
Supplement: Supplementary file [file 33359297]

## Supplementary material

**Table A1: Definition of variables**

| Variable                                  | Definition                                                                                   |
|-------------------------------------------|----------------------------------------------------------------------------------------------|
| <b>Male</b>                               | Equal to 1 if the respondent is male, 0 otherwise                                            |
| <b>Age</b>                                | Respondent's age                                                                             |
| <b>Married</b>                            | Equal to 1 if the respondent is married, 0 otherwise                                         |
| <b>Widowed</b>                            | Equal to 1 if the respondent is widowed, 0 otherwise                                         |
| <b>Primary Education</b>                  | Equal to 1 if the respondent finished primary education, 0 otherwise                         |
| <b>Real Household Income</b>              | Annual household income at 2018 prices                                                       |
| <b>Logarithm of real household income</b> | Logarithm of annual household income at 2018 prices                                          |
| <b>Real Household wealth</b>              | Non-housing household wealth at 2018 prices                                                  |
| <b>Logarithm of real household wealth</b> | Non-housing household wealth at 2018 prices                                                  |
| <b>Working</b>                            | Equal to 1 if the respondent does non-agriculture work, 0 otherwise                          |
| <b>Number of Sons</b>                     | The number of respondents' sons                                                              |
| <b>Number of Daughters</b>                | The number of respondents' daughters                                                         |
| <b>CaredbyDaughter</b>                    | Equal to 1 if the respondent's daughter is the main carer but not son, 0 otherwise           |
| <b>CaredbySon</b>                         | Equal to 1 if the respondent's son is the main carer but not daughter, 0 otherwise           |
| <b>CaredbyBoth</b>                        | Equal to 1 if the respondents are cared by both daughter and son, 0 otherwise                |
| <b>CaredbyOther</b>                       | Equal to 1 if the respondent is mainly cared for by others rather than children, 0 otherwise |
| <b>OnlyDaughterCare</b>                   | Equal to 1 if the respondent's primary carer is daughter only, 0 otherwise                   |
| <b>OnlySonCare</b>                        | Equal to 1 if the respondent's primary carer is son only, 0 otherwise                        |
| <b>SRH_Poor</b>                           | Equal to 1 if the respondent reports very poor or poor health, 0 otherwise                   |
| <b>SRH_CA</b>                             | Self-reported health: 1 poor; 2 fair; 3 good; 4 excellent                                    |
| <b>Chronic</b>                            | Category of chronic disease: 1 No chronic disease; 2 Onset before; and 3 Onset new           |

**Table A2: Ordinal logistic regression models for self-reported health and care provided by son and daughter**

|                                                 | (1)<br>Model 1              | (2)<br>Model 2             |
|-------------------------------------------------|-----------------------------|----------------------------|
| <b>Male</b>                                     | 1.014<br>(0.925 - 1.110)    | 1.104<br>(0.877 - 1.388)   |
| <b>Age</b>                                      | 1.004<br>(0.998 - 1.009)    | 1.016**<br>(1.005 - 1.027) |
| <b>Marital status (ref. single or divorced)</b> |                             |                            |
| <b>Married</b>                                  | 0.908<br>(0.737 - 1.119)    | 0.937<br>(0.631 - 1.392)   |
| <b>Widowed</b>                                  | 1.091<br>(0.865 - 1.376)    | 0.902<br>(0.597 - 1.364)   |
| <b>Primary Education</b>                        | 0.764***<br>(0.694 - 0.841) | 0.900<br>(0.705 - 1.147)   |
| <b>Household Income</b>                         | 1.021*<br>(1.004 - 1.037)   | 1.032<br>(0.997 - 1.068)   |
| <b>Working</b>                                  | 1.704***<br>(1.453 - 1.999) | 1.148<br>(0.689 - 1.914)   |
| <b>Number of Sons</b>                           | 0.967<br>(0.926 - 1.011)    | 0.916<br>(0.834 - 1.007)   |
| <b>Number of Daughters</b>                      | 0.963*<br>(0.927 - 1.000)   | 0.931<br>(0.860 - 1.008)   |
| <b>Care structure (ref: CaredbyOther)</b>       |                             |                            |
| <b>CaredbyDaughter</b>                          | 0.772***<br>(0.665 - 0.898) |                            |
| <b>CaredbySon</b>                               | 1.043<br>(0.942 - 1.156)    |                            |
| <b>CaredbyBoth</b>                              | 0.931<br>(0.805 - 1.077)    |                            |
| <b>Care structure (ref: OnlyDaughterCare)</b>   |                             |                            |
| <b>OnlySonCare</b>                              |                             | 1.466**<br>(1.144 - 1.879) |
| <b>Urban</b>                                    | 1.137**<br>(1.036 - 1.249)  | 1.229<br>(0.991 - 1.525)   |
| <b>Observations</b>                             | 9,142                       | 1,687                      |
| <b>LR chi2</b>                                  | 225.49                      | 104.06                     |
| <b>Prob &gt; chi2</b>                           | 0.0000                      | 0.0000                     |
| <b>AIC</b>                                      | 18459.22                    | 3598.712                   |
| <b>F-test (p-value)</b>                         | 0.0003                      |                            |

*Note:* We use an ordinal logistic model, and the odds ratios (ORs) are reported. The 95% confidence intervals are reported in the parentheses. Year and province dummies are included in all models, but their coefficients are not reported for brevity. The *P*-value of *F*-test for the equality of coefficients on the 'CaredbyDaughter' and 'CaredbySon' is reported at the end of the table.

\**p* < .05, \*\**p* < .01, \*\*\**p* < .001.

**Table A3: Ordinal logistic regression models for self-reported health and care provided by son and daughter: differentiating by region**

|                                                 | Model 1                     |                             | Model 2                  |                            |
|-------------------------------------------------|-----------------------------|-----------------------------|--------------------------|----------------------------|
|                                                 | (1)<br>Urban                | (2)<br>Rural                | (3)<br>Urban             | (4)<br>Rural               |
| <b>Male</b>                                     | 1.084<br>(0.924 - 1.272)    | 0.990<br>(0.885 - 1.107)    | 0.939<br>(0.617 - 1.431) | 1.158<br>(0.876 - 1.530)   |
| <b>Age</b>                                      | 1.009*<br>(1.001 - 1.018)   | 1.001<br>(0.995 - 1.007)    | 1.012<br>(0.991 - 1.032) | 1.017*<br>(1.003 - 1.031)  |
| <b>Marital status (ref. single or divorced)</b> |                             |                             |                          |                            |
| <b>Married</b>                                  | 1.048<br>(0.703 - 1.562)    | 0.870<br>(0.680 - 1.112)    | 1.133<br>(0.552 - 2.325) | 0.866<br>(0.535 - 1.400)   |
| <b>Widowed</b>                                  | 1.312<br>(0.846 - 2.035)    | 1.033<br>(0.784 - 1.360)    | 1.190<br>(0.561 - 2.523) | 0.806<br>(0.488 - 1.333)   |
| <b>Primary Education</b>                        | 0.768**<br>(0.653 - 0.904)  | 0.774***<br>(0.686 - 0.874) | 1.050<br>(0.708 - 1.555) | 0.858<br>(0.623 - 1.183)   |
| <b>Household Income</b>                         | 1.012<br>(0.986 - 1.039)    | 1.024*<br>(1.003 - 1.046)   | 1.026<br>(0.971 - 1.085) | 1.036<br>(0.990 - 1.085)   |
| <b>Working</b>                                  | 1.894***<br>(1.462 - 2.454) | 1.617***<br>(1.315 - 1.988) | 1.175<br>(0.526 - 2.626) | 1.113<br>(0.559 - 2.217)   |
| <b>Number of Sons</b>                           | 1.002<br>(0.927 - 1.083)    | 0.952<br>(0.902 - 1.005)    | 1.129<br>(0.943 - 1.351) | 0.857**<br>(0.764 - 0.962) |
| <b>Number of Daughters</b>                      | 0.969<br>(0.906 - 1.037)    | 0.956<br>(0.913 - 1.002)    | 1.028<br>(0.891 - 1.185) | 0.883*<br>(0.800 - 0.974)  |
| <b>Care structure (ref: CaredbyOther)</b>       |                             |                             |                          |                            |
| <b>CaredbyDaughter</b>                          | 0.914<br>(0.716 - 1.166)    | 0.696***<br>(0.574 - 0.845) |                          |                            |
| <b>CaredbySon</b>                               | 1.149<br>(0.951 - 1.389)    | 1.004<br>(0.887 - 1.135)    |                          |                            |
| <b>CaredbyBoth</b>                              | 0.801<br>(0.625 - 1.025)    | 1.006<br>(0.838 - 1.207)    |                          |                            |
| <b>Care structure (ref: OnlyDaughterCare)</b>   |                             |                             |                          |                            |
| <b>OnlySonCare</b>                              |                             |                             | 1.085<br>(0.717 - 1.644) | 1.594**<br>(1.155 - 2.201) |
| <b>Observations</b>                             | 2,893                       | 6,249                       | 559                      | 1,128                      |
| <b>LR chi2</b>                                  | 116.66                      | 158.18                      | 54.13                    | 83.54                      |
| <b>Prob &gt; chi2</b>                           | 0.0000                      | 0.0000                      | 0.0433                   | 0.0000                     |
| <b>AIC</b>                                      | 5900.187                    | 12576.43                    | 1263.322                 | 2371.701                   |
| <b>F-test (p-value)</b>                         | 0.0937                      | 0.0005                      |                          |                            |

*Note:* We use an ordinal logistic model, and the odds ratios (ORs) are reported. The 95% confidence intervals are reported in the parentheses. Year and province dummies are included in all models, but their coefficients are not reported for brevity. The *P*-values of *F*-tests for the equality of coefficients on the 'CarebyDaughter' and 'CarebySon' are reported at the end of the table.

\**p* < .05, \*\**p* < .01, \*\*\**p* < .001.

**Table A4: Ordinal logistic regression models for self-reported health and care provided by son and daughter: differentiating by gender**

|                                                 | Model 1                     |                             | Model 2                    |                           |
|-------------------------------------------------|-----------------------------|-----------------------------|----------------------------|---------------------------|
|                                                 | (1)<br>Male                 | (2)<br>Female               | (3)<br>Male                | (4)<br>Female             |
| <b>Age</b>                                      | 1.003<br>(0.995 - 1.012)    | 1.004<br>(0.997 - 1.010)    | 1.025<br>(1.000 - 1.051)   | 1.014*<br>(1.001 - 1.027) |
| <b>Marital status (ref. single or divorced)</b> |                             |                             |                            |                           |
| <b>Married</b>                                  | 1.109<br>(0.761 - 1.615)    | 0.842<br>(0.654 - 1.084)    | 1.655<br>(0.748 - 3.660)   | 0.723<br>(0.453 - 1.153)  |
| <b>Widowed</b>                                  | 1.369<br>(0.885 - 2.117)    | 1.000<br>(0.757 - 1.321)    | 1.569<br>(0.679 - 3.627)   | 0.726<br>(0.445 - 1.183)  |
| <b>Primary Education</b>                        | 0.732***<br>(0.634 - 0.845) | 0.791***<br>(0.694 - 0.902) | 0.813<br>(0.523 - 1.263)   | 0.993<br>(0.734 - 1.342)  |
| <b>Household Income</b>                         | 1.040**<br>(1.012 - 1.070)  | 1.008<br>(0.988 - 1.029)    | 1.047<br>(0.971 - 1.129)   | 1.024<br>(0.984 - 1.066)  |
| <b>Working</b>                                  | 2.018***<br>(1.594 - 2.553) | 1.499***<br>(1.203 - 1.869) | 2.089<br>(0.838 - 5.208)   | 0.927<br>(0.491 - 1.751)  |
| <b>Number of Sons</b>                           | 1.014<br>(0.942 - 1.091)    | 0.940*<br>(0.890 - 0.993)   | 0.969<br>(0.800 - 1.174)   | 0.888*<br>(0.794 - 0.992) |
| <b>Number of Daughters</b>                      | 0.963<br>(0.904 - 1.025)    | 0.963<br>(0.918 - 1.010)    | 0.800**<br>(0.682 - 0.939) | 0.984<br>(0.896 - 1.081)  |
| <b>Care structure (ref: CaredbyOther)</b>       |                             |                             |                            |                           |
| <b>CaredbyDaughter</b>                          | 0.801<br>(0.607 - 1.056)    | 0.753**<br>(0.629 - 0.903)  |                            |                           |
| <b>CaredbySon</b>                               | 1.018<br>(0.851 - 1.218)    | 1.066<br>(0.939 - 1.210)    |                            |                           |
| <b>CaredbyBoth</b>                              | 0.835<br>(0.640 - 1.089)    | 0.976<br>(0.818 - 1.165)    |                            |                           |
| <b>Care structure (ref: OnlyDaughterCare)</b>   |                             |                             |                            |                           |
| <b>OnlySonCare</b>                              |                             |                             | 2.046*<br>(1.173 - 3.567)  | 1.394*<br>(1.050 - 1.851) |
| <b>Urban</b>                                    | 1.127<br>(0.966 - 1.315)    | 1.137*<br>(1.009 - 1.281)   | 0.995<br>(0.632 - 1.567)   | 1.302*<br>(1.014 - 1.673) |
| <b>Observations</b>                             | 3,335                       | 5,807                       | 419                        | 1,268                     |
| <b>LR chi2</b>                                  | 138.20                      | 138.26                      | 65.86                      | 81.44                     |
| <b>Prob &gt; chi2</b>                           | 0.0000                      | 0.0000                      | 0.0017                     | 0.0001                    |
| <b>AIC</b>                                      | 6709.542                    | 11780.810                   | 940.3634                   | 2687.311                  |
| <b>F-test (p-value)</b>                         | 0.1206                      | 0.0004                      |                            |                           |

*Note:* We use an ordinal logistic model, and the odds ratios (ORs) are reported. The 95% confidence intervals are reported in the parentheses. Year and province dummies are included in all models, but their coefficients are not reported for brevity. The *P*-values of *F*-tests for the equality of coefficients on the 'CarebyDaughter' and 'CarebySon' are reported at the end of the table.

\**p* < .05, \*\**p* < .01, \*\*\**p* < .001.

**Table A5: Ordinal logistic regression models for self-reported health and care provided by son and daughter: differentiating by wealth**

|                                                 | Model 1                     |                             | Model 2                   |                            |
|-------------------------------------------------|-----------------------------|-----------------------------|---------------------------|----------------------------|
|                                                 | (1)<br>Wealthy              | (2)<br>Less wealthy         | (3)<br>Wealthy            | (4)<br>Less wealthy        |
| <b>Male</b>                                     | 1.086<br>(0.887 - 1.329)    | 1.016<br>(0.916 - 1.126)    | 0.927<br>(0.586 - 1.466)  | 1.179<br>(0.898 - 1.549)   |
| <b>Age</b>                                      | 0.993<br>(0.983 - 1.004)    | 1.006*<br>(1.001 - 1.012)   | 1.004<br>(0.981 - 1.027)  | 1.021**<br>(1.007 - 1.035) |
| <b>Marital status (ref. single or divorced)</b> |                             |                             |                           |                            |
| <b>Married</b>                                  | 1.291<br>(0.752 - 2.216)    | 0.834<br>(0.665 - 1.046)    | 1.101<br>(0.407 - 2.975)  | 0.961<br>(0.618 - 1.495)   |
| <b>Widowed</b>                                  | 1.542<br>(0.855 - 2.781)    | 0.989<br>(0.767 - 1.275)    | 1.292<br>(0.450 - 3.707)  | 0.848<br>(0.535 - 1.344)   |
| <b>Primary Education</b>                        | 0.765*<br>(0.618 - 0.946)   | 0.740***<br>(0.664 - 0.826) | 1.280<br>(0.761 - 2.152)  | 0.778<br>(0.585 - 1.033)   |
| <b>Household Income</b>                         | 1.034*<br>(1.001 - 1.069)   | 1.011<br>(0.992 - 1.030)    | 1.068<br>(0.999 - 1.142)  | 1.013<br>(0.971 - 1.057)   |
| <b>Working</b>                                  | 1.962***<br>(1.424 - 2.702) | 1.592***<br>(1.322 - 1.918) | 2.974*<br>(1.017 - 8.697) | 0.844<br>(0.454 - 1.568)   |
| <b>Number of Sons</b>                           | 1.068<br>(0.969 - 1.178)    | 0.947*<br>(0.902 - 0.995)   | 1.046<br>(0.865 - 1.265)  | 0.858**<br>(0.766 - 0.962) |
| <b>Number of Daughters</b>                      | 1.051<br>(0.967 - 1.143)    | 0.947*<br>(0.908 - 0.989)   | 1.022<br>(0.870 - 1.200)  | 0.898*<br>(0.817 - 0.986)  |
| <b>Care structure (ref: CaredbyOther)</b>       |                             |                             |                           |                            |
| <b>CaredbyDaughter</b>                          | 0.824<br>(0.594 - 1.144)    | 0.761**<br>(0.642 - 0.903)  |                           |                            |
| <b>CaredbySon</b>                               | 1.061<br>(0.841 - 1.338)    | 1.025<br>(0.913 - 1.151)    |                           |                            |
| <b>CaredbyBoth</b>                              | 0.970<br>(0.709 - 1.329)    | 0.903<br>(0.764 - 1.068)    |                           |                            |
| <b>Care structure (ref: OnlyDaughterCare)</b>   |                             |                             |                           |                            |
| <b>OnlySonCare</b>                              |                             |                             | 1.538<br>(0.894 - 2.646)  | 1.445*<br>(1.083 - 1.929)  |
| <b>Urban</b>                                    | 1.053<br>(0.861 - 1.289)    | 1.127*<br>(1.012 - 1.255)   | 1.325<br>(0.855 - 2.052)  | 1.159<br>(0.898 - 1.495)   |
| <b>Observations</b>                             | 1,812                       | 7,330                       | 414                       | 1,273                      |
| <b>LR chi2</b>                                  | 83.76                       | 171.13                      | 88.02                     | 85.10                      |
| <b>Prob &gt; chi2</b>                           | 0.0001                      | 0.0000                      | 0.0000                    | 0.0000                     |
| <b>AIC</b>                                      | 3909.53                     | 14547.66                    | 933.8019                  | 2673.755                   |
| <b>F-test (p-value)</b>                         | 0.1478                      | 0.0016                      |                           |                            |

*Note:* We use an ordinal logistic model, and the odds ratios (ORs) are reported. The 95% confidence intervals are reported in the parentheses. Year and province dummies are included in all models, but their coefficients are not reported for brevity. The *P*-values of *F*-tests for the equality of coefficients on the 'CaredbyDaughter' and 'CaredbySon' are reported at the end of the table.

\**p* < .05, \*\**p* < .01, \*\*\**p* < .001.

**Table A6: Multinomial logistic regression models for the incidence of chronic disease and care provided by daughters and sons**

|                                                 | All                         |                             | Wealthy                  |                             | Less wealthy                |                             |
|-------------------------------------------------|-----------------------------|-----------------------------|--------------------------|-----------------------------|-----------------------------|-----------------------------|
|                                                 | (1)<br>Onset before         | (2)<br>New onset            | (3)<br>Onset before      | (4)<br>New onset            | (5)<br>Onset before         | (6)<br>New onset            |
| <b>Male</b>                                     | 0.867*<br>(0.760 - 0.989)   | 0.919<br>(0.818 - 1.032)    | 0.849<br>(0.636 - 1.133) | 0.808<br>(0.620 - 1.054)    | 0.870<br>(0.749 - 1.010)    | 0.948<br>(0.833 - 1.080)    |
| <b>Age</b>                                      | 1.011**<br>(1.004 - 1.019)  | 1.006<br>(1.000 - 1.013)    | 1.013<br>(0.999 - 1.028) | 1.007<br>(0.994 - 1.020)    | 1.012**<br>(1.003 - 1.021)  | 1.007<br>(0.999 - 1.014)    |
| <b>Marital status (ref. single or divorced)</b> |                             |                             |                          |                             |                             |                             |
| <b>Married</b>                                  | 0.978<br>(0.728 - 1.312)    | 1.307*<br>(1.005 - 1.700)   | 0.857<br>(0.433 - 1.696) | 2.875**<br>(1.402 - 5.896)  | 1.003<br>(0.721 - 1.396)    | 1.139<br>(0.855 - 1.518)    |
| <b>Widowed</b>                                  | 0.899<br>(0.649 - 1.245)    | 1.081<br>(0.808 - 1.446)    | 0.814<br>(0.392 - 1.691) | 2.348*<br>(1.092 - 5.050)   | 0.947<br>(0.655 - 1.369)    | 0.952<br>(0.691 - 1.312)    |
| <b>Primary Education</b>                        | 1.384***<br>(1.201 - 1.595) | 1.371***<br>(1.211 - 1.551) | 1.275<br>(0.933 - 1.742) | 1.384*<br>(1.045 - 1.834)   | 1.438***<br>(1.224 - 1.688) | 1.378***<br>(1.199 - 1.582) |
| <b>Household Income</b>                         | 1.007<br>(0.985 - 1.030)    | 1.012<br>(0.991 - 1.033)    | 1.011<br>(0.968 - 1.056) | 1.029<br>(0.986 - 1.075)    | 1.002<br>(0.976 - 1.029)    | 1.002<br>(0.978 - 1.027)    |
| <b>Working</b>                                  | 0.684**<br>(0.528 - 0.886)  | 0.677***<br>(0.556 - 0.824) | 0.680<br>(0.407 - 1.136) | 0.564**<br>(0.374 - 0.850)  | 0.679*<br>(0.502 - 0.920)   | 0.720**<br>(0.574 - 0.903)  |
| <b>Number of Sons</b>                           | 1.013<br>(0.954 - 1.076)    | 0.995<br>(0.942 - 1.050)    | 0.931<br>(0.818 - 1.059) | 0.989<br>(0.876 - 1.115)    | 1.028<br>(0.959 - 1.102)    | 0.988<br>(0.930 - 1.051)    |
| <b>Number of Daughters</b>                      | 1.010<br>(0.958 - 1.066)    | 1.000<br>(0.953 - 1.048)    | 0.936<br>(0.835 - 1.050) | 1.004<br>(0.902 - 1.118)    | 1.032<br>(0.971 - 1.096)    | 0.998<br>(0.946 - 1.053)    |
| <b>Care structure (ref: CaredbyOther)</b>       |                             |                             |                          |                             |                             |                             |
| <b>CaredbyDaughter</b>                          | 1.132<br>(0.911 - 1.406)    | 1.315**<br>(1.093 - 1.583)  | 0.800<br>(0.505 - 1.267) | 1.062<br>(0.706 - 1.596)    | 1.250<br>(0.975 - 1.604)    | 1.390**<br>(1.127 - 1.714)  |
| <b>CaredbySon</b>                               | 1.070<br>(0.922 - 1.241)    | 1.133<br>(0.992 - 1.294)    | 0.943<br>(0.674 - 1.317) | 1.057<br>(0.774 - 1.443)    | 1.106<br>(0.935 - 1.310)    | 1.172*<br>(1.010 - 1.360)   |
| <b>CaredbyBoth</b>                              | 1.120<br>(0.904 - 1.388)    | 1.303**<br>(1.086 - 1.563)  | 0.863<br>(0.546 - 1.364) | 1.285<br>(0.857 - 1.926)    | 1.245<br>(0.974 - 1.592)    | 1.299*<br>(1.057 - 1.597)   |
| <b>Urban</b>                                    | 1.025<br>(0.894 - 1.175)    | 1.053<br>(0.934 - 1.187)    | 0.871<br>(0.652 - 1.166) | 1.217<br>(0.932 - 1.590)    | 1.065<br>(0.910 - 1.245)    | 1.002<br>(0.875 - 1.148)    |
| <b>Constant</b>                                 | 0.952<br>(0.502 - 1.807)    | 0.431**<br>(0.242 - 0.768)  | 1.489<br>(0.379 - 5.852) | 0.170**<br>(0.0453 - 0.639) | 0.824<br>(0.395 - 1.718)    | 0.516*<br>(0.268 - 0.991)   |
| <b>Observations</b>                             | 9,733                       | 9,733                       | 2,024                    | 2,024                       | 7,709                       | 7,709                       |
| <b>LR chi2</b>                                  | 2829.36                     |                             | 593.42                   |                             | 2319.77                     |                             |
| <b>Prob &gt; chi2</b>                           | 0.0000                      |                             | 0.0000                   |                             | 0.0000                      |                             |
| <b>AIC</b>                                      | 18496.7                     |                             | 3950.094                 |                             | 14624.91                    |                             |

Note: We use a multinomial logistic model, and the relative risk ratios (RRR) are reported. The 95% confidence intervals are reported in the parentheses. Year and province dummies are included in all models, but their coefficients are not reported for brevity.

\* $p < .05$ , \*\* $p < .01$ , \*\*\* $p < .001$ .
